# Supplementary material for: Polymorphic centromere locations in the pathogenic yeast Candida parapsilosis
Source: Genome Res. 2020 May;30(5):684–96. doi: 10.1101/gr.257816.119 (PMC7263194; doi:10.1101/gr.257816.119)
Supplement: Supplemental Material [file supp_gr.257816.119_Supplemental_Table_S2.xlsx]

## Sheet: All CEN details
Table S2	Coordinates of centromeres
Species	Name	Chromosome	Start	End	total_length	LR	length_LR	RR	length_RR	CORE	length_core
C.parapsilosis	CENP1	chr1	362074	368313	6240	LR_1	2827	RR_1	1734	CORE1	1679
CDC317	CENP2	chr2	1309230	1315533	6304	LR_2	2246	RR_2	2248	CORE2	1810
	CENP3	chr3	470791	476632	5842	LR_3	2052	RR_3	2489	CORE3	1301
	CENP4	chr4	888739	895896	7158	LR_4	2291	RR_4	2464	CORE4	2403
	CENP5	chr5	658131	664857	6727	LR_5	2079	RR_5	1973	CORE5	2675
	CENP6	chr6	209331	216041	6711	LR_6	2359	RR_6	2259	CORE6	2093
	CENP7	chr7	470717	477755	7039	LR_7	2916	RR_7	2806	CORE7	1317
	CENP8	chr8	1281311	1287676	6366	LR_8	2084	RR_8	2383	CORE8	1899
C.orthopsilosis	CENO1	PQBP01000006.1	1221987	1227665	5679	LR_1	1303	RR_1	1610	CORE1	2766
90-125	CENO2	PQBP01000001.1	1799134	1804756	5623	LR_2	1581	RR_2	1724	CORE2	2318
GCA_004334915.1	CENO3	PQBP01000003.1	784813	790526	5714	LR_3	935	RR_3	2012	CORE3	2767
	CENO4	PQBP01000004.1	1287754	1293548	5795	LR_4	135	RR_4	2207	CORE4	3453
	CENO5	PQBP01000005.1	571630	576517	4888	LR_5	1031	RR_5	788	CORE5	3069
	CENO6	PQBP01000007.1	653200	660294	7095	LR_6	2279	RR_6	2209	CORE6	2607
	CENO7	PQBP01000009.1	459407	465641	6235	LR_7	1300	RR_7	1459	CORE7	3476
	CENO8	PQBP01000008.1	423403	428850	5448	LR_8	1866	RR_8	936	CORE8	2646
C. metapsilosis	CENM1	scaffold1_size3459122	978590	985894	7305	LR_1	2094	RR_1	3581	CORE1	1630
hybrid assembly	CENM2A	scaffold2_size2959145	1311618	1320831	9214	LR_2A	4308	RR_2A	3546	CORE2A	1360
	CENM2B	scaffold2_size2959145	2207393	2214374	6982	LR_2B	3713	RR_2B	2058	CORE2B	1211
	CENM3	scaffold3_size1388033	461965	471494	9530	LR_3	3191	RR_3	4051	CORE3	2288
	CENM5	scaffold5_size1063617	583379	589185	5807	LR_5	2446	RR_5	2148	CORE5	1213
	CENM6	scaffold6_size820601	335550	341602	6053	LR_6	2699	RR_6	2142	CORE6	1212
	CENM7	scaffold7_size2161850	1746448	1752819	6372	LR_7	2582	RR_7	2574	CORE7	1216
	CENM9	scaffold9_size263853	202520	209225	6706	LR_9	2676	RR_9	2428	CORE9	1602
Supplemental Table S2. Coordinates of centromeres in C. parapsilosis, C. orthopsilosis and C. metapsilosis. Numbers for C. parapsilosis (CDC317) and C. metapsilosis (hybrid) refer to the current assembly for each, available at CGOB (Fitzpatrick et al. 2010). The C. orthopsilosis locations refer to the minION assembly of C. orthopsilosis 90-125 from Lombardi et al (2019).
